# Supplementary material for: Evaluation of atmospheric nitrogen inputs into marine ecosystems of the North Sea and Baltic Sea – part B: contribution by shipping and agricultural emissions
Source: Copernicus journal article supplement (doi:10.5194/bg-2018-365), 2018-11-02
Supplement: Supplementary file 1 [file hbm_ergom_2017_model_description_tag_atmos_agri.pdf › pdfs_partB/hbm_ergom_2017_model_description_tag_atmos_agri.pdf]

# **BSH-ERGOM (of HBM-ERGOM) (v2017 ) Documentation**

T. Neumann, M. Maar, T. Bruenning, I. Lorkowski, F. Schwichtenberg, D. Neumann

June 26, 2018

# Contents

|          |                                                                |           |
|----------|----------------------------------------------------------------|-----------|
| <b>1</b> | <b>Introduction</b>                                            | <b>3</b>  |
| <b>2</b> | <b>Description of model state variables (tracers)</b>          | <b>4</b>  |
| <b>3</b> | <b>Description of model processes, ordered by process type</b> | <b>7</b>  |
| 3.1      | Process type standard . . . . .                                | 7         |
| <b>4</b> | <b>Tracer equations</b>                                        | <b>25</b> |

# 1 Introduction

This is an automatically generated description of the ecosystem model BSH-ERGOM (of HBM-ERGOM) version v2017 . Model formulation is provided by text files in compliance with the rules of the Code Generation Tool (CGT) by Hagen Radtke (see [www.ergom.net](http://www.ergom.net)).

The model consists of a set of state variables, the so called tracers. They are defined and described in Chapter 2.

The following Chapter 3 is the main part of this model description document, since it describes the processes which change the tracer concentrations over time. They are defined analog to chemical processes, two components describe their action:

- A process equation which describes the transformation from precursors (on the left-hand side) to products (on the right-hand side), and
- a turnover rate, describing how fast the process runs.

The rate at which a process changes a tracer can then easily be determined by multiplying the process turnover rate with the stoichiometric ratio in which it consumes or produces the tracer according to the reaction equation.

We structured the documentation into different process types to keep the documentation readable. So all processes belonging to one type (e.g. phytoplankton assimilation) are listed together with their constants and auxiliary variables they depend on. This means that some constants, such as stoichiometric ratios, will occur several times in this documentation, making it longer. We take this compromise for the sake of readability, keeping all information required to understand a specific process in its own section.

The classical way of describing an ecosystem model is by giving the tracer equations. We still do this in the last chapter for the sake of completeness, but rather suggest to stick to Chapter 3 to understand the model, and see Chapter 4 as a supplement only.

## 2 Description of model state variables (tracers)

| Tracers in the water column only |                                          |
|----------------------------------|------------------------------------------|
| amm                              | ammonium (mol/kg)                        |
| nit                              | nitrate (mol/kg)                         |
| phos                             | phosphate (mol/kg)                       |
| sil                              | silicate (mol/kg)                        |
| dia                              | diatoms (mol/kg)                         |
| vertical speed =                 | -0.2 m/day                               |
| opacity =                        | 1.0 m <sup>2</sup> /mol                  |
| flag                             | flagellates (mol/kg)                     |
| opacity =                        | 1.0 m <sup>2</sup> /mol                  |
| cyano                            | cyano bacteria (mol/kg)                  |
| vertical speed =                 | 0.1 m/day                                |
| opacity =                        | 1.0 m <sup>2</sup> /mol                  |
| mez                              | meso zooplankton (mol/kg)                |
| miz                              | micro zooplakton (mol/kg)                |
| det                              | Detritus (mol/kg)                        |
| vertical speed =                 | -1.5 m/day                               |
| opacity =                        | 1.0 m <sup>2</sup> /mol                  |
| dets                             | S-Detritus (mol/kg)                      |
| vertical speed =                 | -1.5 m/day                               |
| ldon                             | ldon is the labile DON fraction (mol/kg) |
| oxy                              | Oxygen (mol/kg)                          |
| amm_with_totatmos_N              | ammonium; containing (mol/kg)            |
| nit_with_totatmos_N              | nitrate; containing (mol/kg)             |
| continued on next page...        |                                          |

## Tracers in the water column only, continued from previous page

dia\_with\_totatmos\_N diatoms; containing (mol/kg)  
vertical speed = -0.2 m/day

flag\_with\_totatmos\_N flagellates; containing (mol/kg)

cyano\_with\_totatmos\_N cyano bacteria; containing (mol/kg)  
vertical speed = 0.1 m/day

mez\_with\_totatmos\_N meso zooplankton; containing (mol/kg)

miz\_with\_totatmos\_N micro zooplakton; containing (mol/kg)

det\_with\_totatmos\_N Detritus; containing (mol/kg)  
vertical speed = -1.5 m/day

ldon\_with\_totatmos\_N ldon is the labile DON fraction; containing (mol/kg)

amm\_with\_agri\_N ammonium; containing (mol/kg)

nit\_with\_agri\_N nitrate; containing (mol/kg)

dia\_with\_agri\_N diatoms; containing (mol/kg)  
vertical speed = -0.2 m/day

flag\_with\_agri\_N flagellates; containing (mol/kg)

cyano\_with\_agri\_N cyano bacteria; containing (mol/kg)  
vertical speed = 0.1 m/day

mez\_with\_agri\_N meso zooplankton; containing (mol/kg)

miz\_with\_agri\_N micro zooplakton; containing (mol/kg)

det\_with\_agri\_N Detritus; containing (mol/kg)  
vertical speed = -1.5 m/day

ldon\_with\_agri\_N ldon is the labile DON fraction; containing (mol/kg)

## Tracers in water and pore water

## Tracers in fluff and sediment

nitr nitrogen in the sediment (mol/m<sup>2</sup>)

continued on next page...

**Tracers in fluff and sediment, continued from previous page****sili                      silicate in the sediment (mol/m<sup>2</sup>)****nitrogen in the sediment; containing (mol/m<sup>2</sup>)**  
**nittr\_with\_totatmos\_N****nittr\_with\_agri\_N      nitrogen in the sediment; containing (mol/m<sup>2</sup>)**

## 3 Description of model processes, ordered by process type

### 3.1 Process type standard

| Processes                                                                                                                                                                                                                                                                                                                                                                            |
|--------------------------------------------------------------------------------------------------------------------------------------------------------------------------------------------------------------------------------------------------------------------------------------------------------------------------------------------------------------------------------------|
| <b>nitrification (sediment only) [mol/m<sup>2</sup>/day]</b><br>$\text{ONnitr} \cdot \text{NOR} \cdot \text{oxy} + \text{amm} \rightarrow$<br>$\text{fnitr} \cdot \text{recs} \cdot \text{nitr} \cdot \text{theta}(\text{oxy})$<br>$\text{nitrification\_amm\_se}$<br>$=$                                                                                                            |
| <b>mineralization of benthic nitrogen, mmol N/m<sup>2</sup>/d (sediment only) [mol/m<sup>2</sup>/day]</b><br>$\text{nitr} + \text{ldn\_N\_sed} \cdot \text{nit} + \text{NOR} \cdot \text{ldn\_O\_sed} \cdot \text{oxy} \rightarrow \text{amm} + \text{rfr} \cdot \text{one\_pburial} \cdot \text{phos}$<br>$\text{recs} \cdot \text{nitr}$<br>$\text{mineralization\_nitr\_}$<br>$=$ |
| <b>mineralization of benthic silicate, mmol N/m<sup>2</sup>/d (sediment only) [mol/m<sup>2</sup>/day]</b><br>$\text{sili} \rightarrow$<br>$\text{recs} \cdot \text{sili}$<br>$\text{mineralization\_sili\_}$<br>$=$                                                                                                                                                                  |
| <b>Grazing of micro-zooplankton on diatoms [mol/kg/day]</b><br>$\text{dia} \rightarrow \text{miz} + \text{rfs} \cdot \text{dets}$<br>$\text{grazing\_miz\_on\_dia} \text{ mizprefdia} \cdot \text{miztotgraz} \cdot \text{miz} \cdot \text{dia}$<br>$=$                                                                                                                              |
| <b>Grazing of micro-zooplankton on flagellates [mol/kg/day]</b><br>$\text{flag} \rightarrow \text{miz}$<br>$\text{grazing\_miz\_on\_flag} \text{ mizprefflag} \cdot \text{miztotgraz} \cdot \text{miz} \cdot \text{flag}$<br>$=$                                                                                                                                                     |
| <b>Grazing of micro-zooplankton on cyano [mol/kg/day]</b><br>$\text{cyano} \rightarrow \text{miz}$<br>$\text{mizprefcyano} \cdot \text{miztotgraz} \cdot \text{miz} \cdot \text{cyano}$<br>$\text{grazing\_miz\_on\_cyanc}$<br>$=$                                                                                                                                                   |
| <b>respiration of micro-zooplankton [mol/kg/day]</b><br>$\text{NOR} \cdot \text{ONamup} \cdot \text{oxy} + \text{miz} \rightarrow \text{ldon\_frac} \cdot \text{ldon} + (\text{one} - \text{ldon\_frac}) \cdot \text{amm} + \text{rfr} \cdot \text{phos}$                                                                                                                            |
| continued on next page...                                                                                                                                                                                                                                                                                                                                                            |

## Processes, continued from previous page

```
respiration_miz = ln_miz * miz_totgraz * food_miz * miz
```

**mortality of micro-zooplankton [mol/kg/day]**

```
miz -> det
```

```
mortality_miz = tld_miz * miz
```

**Grazing of meso-zooplankton on diatoms [mol/kg/day]**

```
dia -> mez + rfs*dets
```

```
grazing_mez_on_dia = mez_prefdia * mez_totgraz * mez * dia
```

**Grazing of meso-zooplankton on flagellates [mol/kg/day]**

```
flag -> mez
```

```
grazing_mez_on_flag = mez_prefflag * mez_totgraz * mez * flag
```

**Grazing of meso-zooplankton on cyano [mol/kg/day]**

```
cyano -> mez
```

```
grazing_mez_on_cyano = mez_prefcyano * mez_totgraz * mez * cyano
```

**Grazing of meso-zooplankton on micro-zooplankton [mol/kg/day]**

```
miz -> mez
```

```
grazing_mez_on_miz = mez_prefmiz * mez_totgraz * mez * miz
```

**respiration of meso-zooplankton [mol/kg/day]**

```
NOR*ONamup*oxy + mez -> rfr*phos + (one-ldon_frac)*amm + ldon_frac*ldon
```

```
respiration_mez = ln_mez * mez_totgraz * food_mez * mez
```

**mortality of meso-zooplankton [mol/kg/day]**

```
mez -> det
```

```
mortality_mez = tld_mez * mez
```

**uptake of ammonium (, phosphate and silicate) by diatoms [mol/kg/day]**

```
rfs*sil + rfr*phos + amm -> NOR*ONamup*oxy + dia
```

```
uptake_amm_by_dia = rp * (dia+p0) * amm * invdin_eps
```

**uptake of nitrate (, phosphate and silicate) by diatoms [mol/kg/day]**

```
rfs*sil + rfr*phos + nit -> NOR*ONniup*oxy + dia
```

```
uptake_nit_by_dia = rp * (dia+p0) * nit * invdin_eps
```

**respiration of diatoms [mol/kg/day]**

```
dia + NOR*ONamup*oxy -> ldon_frac*ldon + (one-ldon_frac)*amm + rfr*phos + rfs*sil
```

continued on next page...



## Processes, continued from previous page

```
respiration_dia = lpn * dia
```

**mortality of diatoms [mol/kg/day]**

```
dia -> det + rfs*dets
```

```
mortality_dia = lpd * dia
```

**uptake of ammonium (and phosphate) by flagellates [mol/kg/day]**

```
rfr*phos + amm -> flag + NOR*ONamup*oxy
```

```
uptake_amm_by_flag rf * (flag+f0) * amm * invdin_eps  
=
```

**uptake of nitrate (and phosphate) by flagellates [mol/kg/day]**

```
nit + rfr*phos -> flag + NOR*ONniup*oxy
```

```
uptake_nit_by_flat rf * (flag+f0) * nit * invdin_eps  
=
```

**respiration of flagellates [mol/kg/day]**

```
flag + NOR*ONamup*oxy -> ldon_frac*ldon + (one-ldon_frac)*amm + rfr*phos
```

```
respiration_flag = lpn * flag
```

**mortality of flagellates [mol/kg/day]**

```
flag -> det
```

```
mortality_flag = lpd * flag
```

**uptake of phosphate by cyano bacteria [mol/kg/day]**

```
rfr*phos -> NOR*ONamup*oxy + cyano
```

```
rb * (cyano + b0)
```

```
uptake_phos_by_cyano
```

```
=
```

**respiration of cyano bacteria [mol/kg/day]**

```
NOR*ONamup*oxy + cyano -> rfr*phos + (one-ldon_frac)*amm + ldon_frac*ldon
```

```
respiration_cyano = lpn * cyano
```

**mortality of cyano bacteria [mol/kg/day]**

```
cyano -> det
```

```
mortality_cyano = lpd * cyano
```

**recycling of detritus [mol/kg/day]**

```
det + ldn_N*nit + NOR*ldn_0*oxy -> amm + rfr*phos
```

```
ldn * det
```

```
recycling_detritus_t
```

```
=
```

**recycling of detritus [mol/kg/day]**

```
dets -> sil
```

continued on next page...

## Processes, continued from previous page

```

lds * dets
recycling_detritus_t
=

```

```

nitrification [mol/kg/day]
NOR*ONitr*oxy + amm -> nit
nitrification =    nf * amm

```

```

degradation of lDON [mol/kg/day]
ldon -> amm
degradation_ldon = ldon_tor * ldon

```

```

nitrification; sub-process for totatmos nitrogen (sediment only) [mol/m2/day]
->
    nitrification_amm_sed * ((1.0)*(1)*
nitrification_amm_sed_max(0.0,min(1.0,amm_with_totatmos_N/max(0.00000000001,amm))
=
    )) / ((1.0)*(1))

```

```

mineralization of bentic nitrogen, mmol N/m2/d; sub-process for totatmos
nitrogen (sediment only) [mol/m2/day]
-> amm_with_totatmos_N
    mineralization_nitr_sed * ((1.0)*(1)*
mineralization_nitr_max(0.0,min(1.0,nitr_with_totatmos_N/max(0.00000000001,nitr)
=
    ))+(ldn_N_sed)*(1)*
    max(0.0,min(1.0,nit_with_totatmos_N/max(0.00000000001,nit))
    )) / ((1.0)*(1)+(ldn_N_sed)*(1))

```

```

Grazing of micro-zooplankton on diatoms; sub-process for totatmos nitrogen
[mol/kg/day]
-> miz_with_totatmos_N
    grazing_miz_on_dia * ((1.0)*(1)*
grazing_miz_on_dia_max(0.0,min(1.0,dia_with_totatmos_N/max(0.00000000001,dia))
=
    )) / ((1.0)*(1))

```

```

Grazing of micro-zooplankton on flagellates; sub-process for totatmos nitrogen
[mol/kg/day]
-> miz_with_totatmos_N
    grazing_miz_on_flag * ((1.0)*(1)*
grazing_miz_on_flag_max(0.0,min(1.0,flag_with_totatmos_N/max(0.00000000001,flag)
=
    ))) / ((1.0)*(1))

```

```

Grazing of micro-zooplankton on cyano; sub-process for totatmos nitrogen
[mol/kg/day]
-> miz_with_totatmos_N
    grazing_miz_on_cyano * ((1.0)*(1)*
grazing_miz_on_cyano_max(0.0,min(1.0,cyano_with_totatmos_N/max(0.00000000001,cyano)
=
    ))) / ((1.0)*(1))

```

continued on next page...

## Processes, continued from previous page

**respiration of micro-zooplankton; sub-process for totatmos nitrogen [mol/kg/day]**

```
-> ldon_frac*ldon_with_totatmos_N + (one-ldon_frac)*amm_with_totatmos_N
      respiration_miz * ((1.0)*(1)*
respiration_miz_totatmax(0.0,min(1.0,miz_with_totatmos_N/max(0.00000000001,miz))
=
      )) / ((1.0)*(1))
```

**mortality of micro-zooplankton; sub-process for totatmos nitrogen [mol/kg/day]**

```
-> det_with_totatmos_N
      mortality_miz * ((1.0)*(1)*
mortality_miz_totatmax(0.0,min(1.0,miz_with_totatmos_N/max(0.00000000001,miz))
=
      )) / ((1.0)*(1))
```

**Grazing of meso-zooplankton on diatoms; sub-process for totatmos nitrogen [mol/kg/day]**

```
-> mez_with_totatmos_N
      grazing_mez_on_dia * ((1.0)*(1)*
grazing_mez_on_dia_tmax(0.0,min(1.0,dia_with_totatmos_N/max(0.00000000001,dia))
=
      )) / ((1.0)*(1))
```

**Grazing of meso-zooplankton on flagellates; sub-process for totatmos nitrogen [mol/kg/day]**

```
-> mez_with_totatmos_N
      grazing_mez_on_flag * ((1.0)*(1)*
grazing_mez_on_flag_max(0.0,min(1.0,flag_with_totatmos_N/max(0.00000000001,flag)
=
      ))) / ((1.0)*(1))
```

**Grazing of meso-zooplankton on cyano; sub-process for totatmos nitrogen [mol/kg/day]**

```
-> mez_with_totatmos_N
      grazing_mez_on_cyano * ((1.0)*(1)*
grazing_mez_on_cyano_max(0.0,min(1.0,cyano_with_totatmos_N/max(0.00000000001,cyano)
=
      ))) / ((1.0)*(1))
```

**Grazing of meso-zooplankton on micro-zooplankton; sub-process for totatmos nitrogen [mol/kg/day]**

```
-> mez_with_totatmos_N
      grazing_mez_on_miz * ((1.0)*(1)*
grazing_mez_on_miz_tmax(0.0,min(1.0,miz_with_totatmos_N/max(0.00000000001,miz))
=
      )) / ((1.0)*(1))
```

**respiration of meso-zooplankton; sub-process for totatmos nitrogen [mol/kg/day]**

```
-> ldon_frac*ldon_with_totatmos_N + (one-ldon_frac)*amm_with_totatmos_N
      respiration_mez * ((1.0)*(1)*
respiration_mez_totatmax(0.0,min(1.0,mez_with_totatmos_N/max(0.00000000001,mez))
=
      )) / ((1.0)*(1))
```

continued on next page...

## Processes, continued from previous page

**mortality of meso-zooplankton; sub-process for totatmos nitrogen [mol/kg/day]**

```
-> det_with_totatmos_N
      mortality_mez * ((1.0)*(1)*
mortality_mez_totatmax(0.0,min(1.0,mez_with_totatmos_N/max(0.00000000001,mez))
=
      )) / ((1.0)*(1))
```

**uptake of ammonium (, phosphate and silicate) by diatoms; sub-process for totatmos nitrogen [mol/kg/day]**

```
-> dia_with_totatmos_N
      uptake_amm_by_dia * ((1.0)*(1)*
uptake_amm_by_dia_tmax(0.0,min(1.0,amm_with_totatmos_N/max(0.00000000001,amm))
=
      )) / ((1.0)*(1))
```

**uptake of nitrate (, phosphate and silicate) by diatoms; sub-process for totatmos nitrogen [mol/kg/day]**

```
-> dia_with_totatmos_N
      uptake_nit_by_dia * ((1.0)*(1)*
uptake_nit_by_dia_tmax(0.0,min(1.0,nit_with_totatmos_N/max(0.00000000001,nit))
=
      )) / ((1.0)*(1))
```

**respiration of diatoms; sub-process for totatmos nitrogen [mol/kg/day]**

```
-> ldon_frac*ldon_with_totatmos_N + (one-ldon_frac)*amm_with_totatmos_N
      respiration_dia * ((1.0)*(1)*
respiration_dia_totatmax(0.0,min(1.0,dia_with_totatmos_N/max(0.00000000001,dia))
=
      )) / ((1.0)*(1))
```

**mortality of diatoms; sub-process for totatmos nitrogen [mol/kg/day]**

```
-> det_with_totatmos_N
      mortality_dia * ((1.0)*(1)*
mortality_dia_totatmax(0.0,min(1.0,dia_with_totatmos_N/max(0.00000000001,dia))
=
      )) / ((1.0)*(1))
```

**uptake of ammonium (and phosphate) by flagellates; sub-process for totatmos nitrogen [mol/kg/day]**

```
-> flag_with_totatmos_N
      uptake_amm_by_flag * ((1.0)*(1)*
uptake_amm_by_flag_tmax(0.0,min(1.0,amm_with_totatmos_N/max(0.00000000001,amm))
=
      )) / ((1.0)*(1))
```

**uptake of nitrate (and phosphate) by flagellates; sub-process for totatmos nitrogen [mol/kg/day]**

```
-> flag_with_totatmos_N
      uptake_nit_by_flat * ((1.0)*(1)*
uptake_nit_by_flat_tmax(0.0,min(1.0,nit_with_totatmos_N/max(0.00000000001,nit))
=
      )) / ((1.0)*(1))
```

continued on next page...

## Processes, continued from previous page

**respiration of flagellates; sub-process for totatmos nitrogen [mol/kg/day]**

```
-> ldon_frac*ldon_with_totatmos_N + (one-ldon_frac)*amm_with_totatmos_N
      respiration_flag * ((1.0)*(1)*
respiration_flag_totmax(0.0,min(1.0,flag_with_totatmos_N/max(0.00000000001,flag)
=
      ))) / ((1.0)*(1))
```

**mortality of flagellates; sub-process for totatmos nitrogen [mol/kg/day]**

```
-> det_with_totatmos_N
      mortality_flag * ((1.0)*(1)*
mortality_flag_totatmax(0.0,min(1.0,flag_with_totatmos_N/max(0.00000000001,flag)
=
      ))) / ((1.0)*(1))
```

**respiration of cyano bacteria; sub-process for totatmos nitrogen [mol/kg/day]**

```
-> ldon_frac*ldon_with_totatmos_N + (one-ldon_frac)*amm_with_totatmos_N
      respiration_cyano * ((1.0)*(1)*
respiration_cyano_tmax(0.0,min(1.0,cyano_with_totatmos_N/max(0.00000000001,cyano)
=
      ))) / ((1.0)*(1))
```

**mortality of cyano bacteria; sub-process for totatmos nitrogen [mol/kg/day]**

```
-> det_with_totatmos_N
      mortality_cyano * ((1.0)*(1)*
mortality_cyano_totamax(0.0,min(1.0,cyano_with_totatmos_N/max(0.00000000001,cyano)
=
      ))) / ((1.0)*(1))
```

**recycling of detritus; sub-process for totatmos nitrogen [mol/kg/day]**

```
-> amm_with_totatmos_N
      recycling_detritus_to_n * ((1.0)*(1)*
recycling_detritus_tmax(0.0,min(1.0,det_with_totatmos_N/max(0.00000000001,det))
=
      )+(ldn_N)*(1)*
      max(0.0,min(1.0,nit_with_totatmos_N/max(0.00000000001,nit))
      )) / ((1.0)*(1)+(ldn_N)*(1))
```

**nitrification; sub-process for totatmos nitrogen [mol/kg/day]**

```
-> nit_with_totatmos_N
      nitrification * ((1.0)*(1)*
nitrification_totatmax(0.0,min(1.0,amm_with_totatmos_N/max(0.00000000001,amm))
=
      )) / ((1.0)*(1))
```

**degradation of lDON; sub-process for totatmos nitrogen [mol/kg/day]**

```
-> amm_with_totatmos_N
      degradation_ldon * ((1.0)*(1)*
degradation_ldon_totmax(0.0,min(1.0,ldon_with_totatmos_N/max(0.00000000001,ldon)
=
      ))) / ((1.0)*(1))
```

continued on next page...

## Processes, continued from previous page

**nitrification; sub-process for agri nitrogen (sediment only) [mol/m<sup>2</sup>/day]**

```
->
      nitrification_amm_sed * ((1.0)*(1)*
nitrification_amm_sedmax(0.0,min(1.0,amm_with_agri_N/max(0.00000000001,amm)))) /
=
      ((1.0)*(1))
```

**mineralization of bentic nitrogen, mmol N/m<sup>2</sup>/d; sub-process for agri nitrogen (sediment only) [mol/m<sup>2</sup>/day]**

```
-> amm_with_agri_N
      mineralization_nitr_sed * ((1.0)*(1)*
mineralization_nitr_max(0.0,min(1.0,nitr_with_agri_N/max(0.00000000001,nitr)))+
=
      (ldn_N_sed)*(1)*
      max(0.0,min(1.0,nit_with_agri_N/max(0.00000000001,nit)))) /
      ((1.0)*(1)+(ldn_N_sed)*(1))
```

**Grazing of micro-zooplankton on diatoms; sub-process for agri nitrogen [mol/kg/day]**

```
-> miz_with_agri_N
      grazing_miz_on_dia * ((1.0)*(1)*
grazing_miz_on_dia_amax(0.0,min(1.0,dia_with_agri_N/max(0.00000000001,dia)))) /
=
      ((1.0)*(1))
```

**Grazing of micro-zooplankton on flagellates; sub-process for agri nitrogen [mol/kg/day]**

```
-> miz_with_agri_N
      grazing_miz_on_flag * ((1.0)*(1)*
grazing_miz_on_flag_max(0.0,min(1.0,flag_with_agri_N/max(0.00000000001,flag))))
=
      / ((1.0)*(1))
```

**Grazing of micro-zooplankton on cyano; sub-process for agri nitrogen [mol/kg/day]**

```
-> miz_with_agri_N
      grazing_miz_on_cyano * ((1.0)*(1)*
grazing_miz_on_cyano_max(0.0,min(1.0,cyano_with_agri_N/max(0.00000000001,cyano)))
=
      )) / ((1.0)*(1))
```

**respiration of micro-zooplankton; sub-process for agri nitrogen [mol/kg/day]**

```
-> ldon_frac*ldon_with_agri_N + (one-ldon_frac)*amm_with_agri_N
      respiration_miz * ((1.0)*(1)*
respiration_miz_agri_max(0.0,min(1.0,miz_with_agri_N/max(0.00000000001,miz)))) /
=
      ((1.0)*(1))
```

**mortality of micro-zooplankton; sub-process for agri nitrogen [mol/kg/day]**

continued on next page...

## Processes, continued from previous page

```

-> det_with_agri_N
      mortality_miz * ((1.0)*(1)*
mortality_miz_agri_Nmax(0.0,min(1.0,miz_with_agri_N/max(0.00000000001,miz)))) /
=      ((1.0)*(1))

```

**Grazing of meso-zooplankton on diatoms; sub-process for agri nitrogen**

[mol/kg/day]

```

-> mez_with_agri_N
      grazing_mez_on_dia * ((1.0)*(1)*
grazing_mez_on_dia_max(0.0,min(1.0,dia_with_agri_N/max(0.00000000001,dia)))) /
=      ((1.0)*(1))

```

**Grazing of meso-zooplankton on flagellates; sub-process for agri nitrogen**

[mol/kg/day]

```

-> mez_with_agri_N
      grazing_mez_on_flag * ((1.0)*(1)*
grazing_mez_on_flag_max(0.0,min(1.0,flag_with_agri_N/max(0.00000000001,flag))))
=      / ((1.0)*(1))

```

**Grazing of meso-zooplankton on cyano; sub-process for agri nitrogen [mol/kg/day]**

```

-> mez_with_agri_N
      grazing_mez_on_cyano * ((1.0)*(1)*
grazing_mez_on_cyano_max(0.0,min(1.0,cyano_with_agri_N/max(0.00000000001,cyano)))
=      )) / ((1.0)*(1))

```

**Grazing of meso-zooplankton on micro-zooplankton; sub-process for agri nitrogen**

[mol/kg/day]

```

-> mez_with_agri_N
      grazing_mez_on_miz * ((1.0)*(1)*
grazing_mez_on_miz_max(0.0,min(1.0,miz_with_agri_N/max(0.00000000001,miz)))) /
=      ((1.0)*(1))

```

**respiration of meso-zooplankton; sub-process for agri nitrogen [mol/kg/day]**

```

-> ldon_frac*ldon_with_agri_N + (one-ldon_frac)*amm_with_agri_N
      respiration_mez * ((1.0)*(1)*
respiration_mez_agri_Nmax(0.0,min(1.0,mez_with_agri_N/max(0.00000000001,mez)))) /
=      ((1.0)*(1))

```

**mortality of meso-zooplankton; sub-process for agri nitrogen [mol/kg/day]**

```

-> det_with_agri_N
      mortality_mez * ((1.0)*(1)*
mortality_mez_agri_Nmax(0.0,min(1.0,mez_with_agri_N/max(0.00000000001,mez)))) /
=      ((1.0)*(1))

```

continued on next page...

## Processes, continued from previous page

**uptake of ammonium (, phosphate and silicate) by diatoms; sub-process for agri nitrogen [mol/kg/day]**

```
-> dia_with_agri_N
      uptake_amm_by_dia * ((1.0)*(1)*
uptake_amm_by_dia_agmax(0.0,min(1.0,amm_with_agri_N/max(0.00000000001,amm)))) /
=
      ((1.0)*(1))
```

**uptake of nitrate (, phosphate and silicate) by diatoms; sub-process for agri nitrogen [mol/kg/day]**

```
-> dia_with_agri_N
      uptake_nit_by_dia * ((1.0)*(1)*
uptake_nit_by_dia_agmax(0.0,min(1.0,nit_with_agri_N/max(0.00000000001,nit)))) /
=
      ((1.0)*(1))
```

**respiration of diatoms; sub-process for agri nitrogen [mol/kg/day]**

```
-> ldon_frac*ldon_with_agri_N + (one-ldon_frac)*amm_with_agri_N
      respiration_dia * ((1.0)*(1)*
respiration_dia_agrimax(0.0,min(1.0,dia_with_agri_N/max(0.00000000001,dia)))) /
=
      ((1.0)*(1))
```

**mortality of diatoms; sub-process for agri nitrogen [mol/kg/day]**

```
-> det_with_agri_N
      mortality_dia * ((1.0)*(1)*
mortality_dia_agri_Nmax(0.0,min(1.0,dia_with_agri_N/max(0.00000000001,dia)))) /
=
      ((1.0)*(1))
```

**uptake of ammonium (and phosphate) by flagellates; sub-process for agri nitrogen [mol/kg/day]**

```
-> flag_with_agri_N
      uptake_amm_by_flag * ((1.0)*(1)*
uptake_amm_by_flag_amax(0.0,min(1.0,amm_with_agri_N/max(0.00000000001,amm)))) /
=
      ((1.0)*(1))
```

**uptake of nitrate (and phosphate) by flagellates; sub-process for agri nitrogen [mol/kg/day]**

```
-> flag_with_agri_N
      uptake_nit_by_flat * ((1.0)*(1)*
uptake_nit_by_flat_amax(0.0,min(1.0,nit_with_agri_N/max(0.00000000001,nit)))) /
=
      ((1.0)*(1))
```

**respiration of flagellates; sub-process for agri nitrogen [mol/kg/day]**

```
-> ldon_frac*ldon_with_agri_N + (one-ldon_frac)*amm_with_agri_N
      respiration_flag * ((1.0)*(1)*
respiration_flag_agmax(0.0,min(1.0,flag_with_agri_N/max(0.00000000001,flag))))
=
      / ((1.0)*(1))
```

continued on next page...



## Processes, continued from previous page

**mortality of flagellates; sub-process for agri nitrogen [mol/kg/day]**

```

-> det_with_agri_N
      mortality_flag * ((1.0)*(1)*
mortality_flag_agri_max(0.0,min(1.0,flag_with_agri_N/max(0.00000000001,flag))))
=
      / ((1.0)*(1))

```

**respiration of cyano bacteria; sub-process for agri nitrogen [mol/kg/day]**

```

-> ldon_frac*ldon_with_agri_N + (one-ldon_frac)*amm_with_agri_N
      respiration_cyano * ((1.0)*(1)*
respiration_cyano_agmax(0.0,min(1.0,cyano_with_agri_N/max(0.00000000001,cyano)))
=
      )) / ((1.0)*(1))

```

**mortality of cyano bacteria; sub-process for agri nitrogen [mol/kg/day]**

```

-> det_with_agri_N
      mortality_cyano * ((1.0)*(1)*
mortality_cyano_agrimax(0.0,min(1.0,cyano_with_agri_N/max(0.00000000001,cyano)))
=
      )) / ((1.0)*(1))

```

**recycling of detritus; sub-process for agri nitrogen [mol/kg/day]**

```

-> amm_with_agri_N
      recycling_detritus_to_n * ((1.0)*(1)*
recycling_detritus_tmax(0.0,min(1.0,det_with_agri_N/max(0.00000000001,det)))+
=
      (ldn_N)*(1)*
      max(0.0,min(1.0,nit_with_agri_N/max(0.00000000001,nit)))) /
      ((1.0)*(1)+(ldn_N)*(1))

```

**nitrification; sub-process for agri nitrogen [mol/kg/day]**

```

-> nit_with_agri_N
      nitrification * ((1.0)*(1)*
nitrification_agri_Nmax(0.0,min(1.0,amm_with_agri_N/max(0.00000000001,amm)))) /
=
      ((1.0)*(1))

```

**degradation of lDON; sub-process for agri nitrogen [mol/kg/day]**

```

-> amm_with_agri_N
      degradation_ldon * ((1.0)*(1)*
degradation_ldon_agmax(0.0,min(1.0,ldon_with_agri_N/max(0.00000000001,ldon))))
=
      / ((1.0)*(1))

```

**Auxiliary variables**

```

Kspburial2 =      Kspburial*Kspburial

```

```

oxy2 =      oxy*oxy

```

continued on next page...

### Auxiliary variables, continued from previous page

#### auxiliary for calculating mineralization and nitrification

```
recs = exp(q10_rec*bottemp) * (theta(oxy)*dn_sed + (1.0-
theta(oxy))*dn_sed_anox)
```

#### using nitrate (and sulphate) to oxidize benthic organic material

```
denitscal = (1.0-theta(oxy)) * nit/(ksdenit+nit)
```

Under oxic conditions benthic OM is oxidated by oxygen. Under anoxic conditions benthic OM is oxidated by nitrate, if available. Otherwise by sulfate as negative o2

```
ldn_N_sed = NNdenit * denitscal
```

Under oxic conditions benthic OM is oxidated by oxygen. Under anoxic conditions benthic OM is oxidated by nitrate, if available. Otherwise by sulfate as negative o2

```
ldn_O_sed = ONamup * (one - denitscal)
```

Phosphate is buried under oxic conditions but no P burial under anoxic conditions

```
one_pburial = 1.0 - theta(oxy) * pfrac * oxy2 * (oxy2 + Kspburial2)
```

#### nutrient limitation phosphate

```
nutlimc = phos*phos/(albrfr2+phos*phos)
```

#### ratio of optimal light for bluegreen

```
ppikb = min(lightk/min_ocyano1,one)
```

#### uptake rate of cyano

```
rb = rb0*min(nutlimc, ppikb*exp(one-ppikb))*four/(four +
exp(cyanotl1 - temp))*(atan(-sali+cyanosul)/pi+half)
```

#### nutrient limitation phosphate or nitrogen

```
nutlimf = min(((amm+nit)*(amm+nit))/(alphaf2+(amm+nit)*(amm+nit)),
nutlimc)
```

#### ratio of optimal light for flagellats

```
ppikf = min(lightk/min_oflag1,one)
```

#### uptake rate of flag

```
rf = rf0*min(nutlimf,ppikf*exp(one-ppikf))*flagtsc*exp(flagtll*
temp)
```

#### nutrient limitation phosphate, nitrogen or silicate

```
nutlimd = min(nutlimf, sil*sil/(alprfs2+sil*sil))
```

#### ratio of optimal light for diatoms

```
ppikp = min(lightk/min_odial,one)
```

continued on next page...

### Auxiliary variables, continued from previous page

#### uptake rate of dia

$rp = rp0 * \min(nutlimd, ppikp * \exp(one - ppikp))$

#### nitrification rate

$nf = rnit * oxy / (ksnit + oxy) * \exp(anit * temp)$

#### More help variables

$foodmez = mezprefdia * dia + mezprefflag * flag + mezprefcyano * cyano + mezprefmiz * miz$

#### help variable

$temp2 = temp * temp$

#### mez grazing temperature dependece

$mezgt = half + mez\_tscale * temp2 / (meztck + temp2)$

#### food dependent grazing; these have been divided by food; mezfgrazf2 low compared to paper

$mezgscal = mezgraz * foodmez / (foodmez * foodmez + mezgrazf * mezgrazf)$

#### total mez grazin

$meztotgraz = mezgscal * mezgt$

#### More help variables

$foodmiz = mizprefdia * dia + mizprefflag * flag + mizprefcyano * cyano$

#### miz grazing temperature dependece

$mizgt = one + temp2 / (miztk + temp2)$

#### food dependent grazing; these have been divided by food

$mizgscal = mizgraz * foodmiz / (foodmiz * foodmiz + mizgrazf * mizgrazf)$

#### total miz grazing

$miztotgraz = mizgscal * mizgt$

#### phytoplankton respiration loss rate (to inorg. compounds)

$lpn = nb$

#### respiration of nitrate under hypoxic conditions; else = 0.0

$ldn\_N = zero$

#### less hydrogen sulphite formation under hypoxic conditions; else = ONamup

$ldn\_O = ONamup$

continued on next page...

### Auxiliary variables, continued from previous page

#### phytoplankton respiration loss rate (to detritus)

lpd =  $\text{deltao}$

#### meso zoo plankton loss rates (mortality)

tldmez =  $\text{ldmez} + \text{mezcl} * \text{mez}$

#### micro zoo plankton loss rates (mortality)

tldmiz =  $\text{ldmiz}$

#### factor for detritus recycling rates (lds and ldn)

fac =  $\exp(\text{q10\_rec} * \text{temp})$

#### detritus recycling rate (nitrogen, D => Amm)

ldn =  $\text{dn} * \text{fac}$

#### detritus recycling rate (silicate, Ds => S)

lds =  $\text{ds} * \text{fac}$

#### total inorganic N inversed and eps

invdin\_eps =  $\text{one} / (\text{nit} + \text{amm} + \text{eps})$

### Constants

#### Loss rate P to N

nb = 0.01

#### Loss Rate PP to D

deltao = 0.02

#### Loss Rate Detritus to N

dn = 0.01

#### Loss Rate S-Detritus to S

ds = 0.004

#### Half-sat. inhib NO3 denit

ksdenit = 0.1

#### Half-sat. O2 nitrification

ksnit = 0.01

#### Max nitrification rate at T0

rnit = 0.1

#### Max dia uptake rate at T0

continued on next page...

| Constants, continued from previous page |       |
|-----------------------------------------|-------|
| rp0 =                                   | 1.0   |
| <b>Max Flag uptake rate at T0</b>       |       |
| rf0 =                                   | 0.7   |
| <b>Max cyano uptake rate at T0</b>      |       |
| rb0 =                                   | 0.5   |
| <b>Lower T limit Cyanos</b>             |       |
| cyanotll =                              | 15.0  |
| <b>Upper S limit Cyanos</b>             |       |
| cyanosul =                              | 12.0  |
| <b>flag temp scaling</b>                |       |
| flagtll =                               | 0.06  |
| <b>flag temp dep.</b>                   |       |
| flagtsc =                               | 0.8   |
| <b>background values dia</b>            |       |
| p0 =                                    | 0.001 |
| <b>Background values flag</b>           |       |
| f0 =                                    | 0.001 |
| <b>Background values cyano</b>          |       |
| b0 =                                    | 0.001 |
| <b>Min opt. dia light W/m2</b>          |       |
| min_odial =                             | 75.0  |
| <b>Min opt. flag light W/m2</b>         |       |
| min_oflagl =                            | 75.0  |
| <b>Min opt. cyan light W/m2</b>         |       |
| min_ocyanol =                           | 75.0  |
| <b>Recycling temp dep [/degC]</b>       |       |
| q10_rec =                               | 0.15  |
| <b>Nitrification temp dep[/degC]</b>    |       |
| anit =                                  | 0.11  |
| continued on next page...               |       |

| Constants, continued from previous page             |       |
|-----------------------------------------------------|-------|
| <b>Stoichiometric O/N ratio nitr</b>                |       |
| ONnitr =                                            | 2.0   |
| <b>Stoichiometric Norg/Nit denit</b>                |       |
| NNdenit =                                           | 5.3   |
| <b>Stoech. O/N ratio nitr uptake</b>                |       |
| ONniup =                                            | 8.625 |
| <b>Stoech. O/N ratio amm up/rel</b>                 |       |
| ONamup =                                            | 6.625 |
| <b>Redfield Ratio S/N</b>                           |       |
| rfs =                                               | 0.94  |
| <b>Redfield Ratio P/N</b>                           |       |
| rfr =                                               | 0.072 |
| <b>Half-saturation p burial Oxygen dependance</b>   |       |
| Kspburial =                                         | 0.1   |
| <b>Fraction of recycled N nitrified in sediment</b> |       |
| fnitr =                                             | 0.4   |
| <b>Loss Rate Sediment to N</b>                      |       |
| dn_sed =                                            | 0.01  |
| <b>Loss Rate Sed. to N, anoxia</b>                  |       |
| dn_sed_anox =                                       | 0.005 |
| <b>Recycling temp dep sed. [/C]</b>                 |       |
| q10_recs =                                          | 0.15  |
| <b>Nnorm/Onorm</b>                                  |       |
| NOR =                                               | 0.012 |
| <b>zero</b>                                         |       |
| zero =                                              | 0.0   |
| <b>one</b>                                          |       |
| one =                                               | 1.0   |
| <b>four</b>                                         |       |
| four =                                              | 4.0   |
| continued on next page...                           |       |

### Constants, continued from previous page

**half**

half = 0.5

**dummy**

ldn\_N\_sed = 0.0

**dummy**

ldn\_0\_sed = 0.0

**dummy**

one\_pburial = 0.0

**dummy**

ldn\_N = 0.0

**dummy**

ldn\_0 = 0.0

**Mesozoopl. grazing constant**

mezgraz = 0.2

**Microzoopl. grazing constant**

mizgraz = 0.4

**Mesozoopl. food dep. constant**

mezgrazf = 0.4

**Microzoopl. food dep. const**

mizgrazf = 0.2

**Microzoopl. grazing temp dep.**

miztk = 150.0

**Mezozoopl. grazing temp dep.**

meztk = 150.0

**Mezozoopl. temp scaling**

mez\_tscale = 2.0

**Mesozoopl. closure**

mezcl = 0.02

**Mesozoopl. mortality**

continued on next page...

| Constants, continued from previous page |      |
|-----------------------------------------|------|
| ldmez =                                 | 0.02 |
| <b>Microzoopl. mortality</b>            |      |
| ldmiz =                                 | 0.05 |
| <b>Mesozoopl. excretion</b>             |      |
| lnmez =                                 | 0.45 |
| <b>Microzoopl. excretion</b>            |      |
| lnmiz =                                 | 0.3  |
| <b>Preference of mezoo on dia</b>       |      |
| mezprefdia =                            | 1.0  |
| <b>Preference of mezoo on flag</b>      |      |
| mezprefflag =                           | 0.3  |
| <b>Preference of mezoo on cyano</b>     |      |
| mezprefcyano =                          | 0.3  |
| <b>Preference of mezoo on mizoo</b>     |      |
| mezprefmiz =                            | 1.0  |
| <b>Preference of mizoo on dia</b>       |      |
| mizprefdia =                            | 0.3  |
| <b>Preference of mizoo on flag</b>      |      |
| mizprefflag =                           | 1.0  |
| <b>Preference of mizoo on cyano</b>     |      |
| mizprefcyano =                          | 0.3  |
| <b>Fraction of produced IDON</b>        |      |
| ldon_frac =                             | 0.1  |
| <b>IDON turning over rate [1/d]</b>     |      |
| ldon_tor =                              | 0.03 |
| Process limitation factors              |      |



## 4 Tracer equations

| Tracer equations                                       |                                                             |
|--------------------------------------------------------|-------------------------------------------------------------|
| <b>Change of: ammonium</b>                             |                                                             |
| $\frac{d}{dt} \text{ amm} =$                           |                                                             |
| + mineralization_nitr_sed/(cgt_cN/m2/d<br>cgt_density) | mineralization of benthic nitrogen, mmol                    |
| + (respiration_miz)*((one-<br>ldon_frac))              | respiration of micro-zooplankton                            |
| + (respiration_mez)*((one-<br>ldon_frac))              | respiration of meso-zooplankton                             |
| + (respiration_dia)*((one-<br>ldon_frac))              | respiration of diatoms                                      |
| + (respiration_flag)*((one-<br>ldon_frac))             | respiration of flagellates                                  |
| + (respiration_cyano)*((one-<br>ldon_frac))            | respiration of cyano bacteria                               |
| + recycling_detritus_to_n                              | recycling of detritus                                       |
| + degradation_ldon                                     | degradation of LDON                                         |
| - nitrification_amm_sed/(cgt_cel<br>cgt_density)       | nitrification                                               |
| - uptake_amm_by_dia                                    | uptake of ammonium (, phosphate and silicate)<br>by diatoms |
| - uptake_amm_by_flag                                   | uptake of ammonium (and phosphate) by<br>flagellates        |
| - nitrification                                        | nitrification                                               |
| continued on next page...                              |                                                             |

## Tracer equations, continued from previous page

**Change of: nitrate**

$$\frac{d}{dt} \text{nit} =$$

|                                                                              |                                                            |
|------------------------------------------------------------------------------|------------------------------------------------------------|
| + nitrification                                                              | nitrification                                              |
| - (mineralization_nitr_sed)*<br>(ldn_N_sed)/(cgt_cellheight*<br>cgt_density) | mineralization of bentic nitrogen, mmol<br>N/m2/d          |
| - uptake_nit_by_dia                                                          | uptake of nitrate (, phosphate and silicate) by<br>diatoms |
| - uptake_nit_by_flat                                                         | uptake of nitrate (and phosphate) by flagellates           |
| - (recycling_detritus_to_n)*<br>(ldn_N)                                      | recycling of detritus                                      |

**Change of: phosphate**

$$\frac{d}{dt} \text{phos} =$$

|                                                                                    |                                                             |
|------------------------------------------------------------------------------------|-------------------------------------------------------------|
| + (mineralization_nitr_sed)*<br>(rfr*one_pburial)<br>/(cgt_cellheight*cgt_density) | mineralization of bentic nitrogen, mmol<br>N/m2/d           |
| + (respiration_miz)*(rfr)                                                          | respiration of micro-zooplankton                            |
| + (respiration_mez)*(rfr)                                                          | respiration of meso-zooplankton                             |
| + (respiration_dia)*(rfr)                                                          | respiration of diatoms                                      |
| + (respiration_flag)*(rfr)                                                         | respiration of flagelattes                                  |
| + (respiration_cyano)*(rfr)                                                        | respiration of cyano bacteria                               |
| + (recycling_detritus_to_n)*<br>(rfr)                                              | recycling of detritus                                       |
| - (uptake_amm_by_dia)*(rfr)                                                        | uptake of ammonium (, phosphate and silicate)<br>by diatoms |
| - (uptake_nit_by_dia)*(rfr)                                                        | uptake of nitrate (, phosphate and silicate) by<br>diatoms  |
| - (uptake_amm_by_flag)*(rfr)                                                       | uptake of ammonium (and phosphate) by<br>flagellates        |

continued on next page...

## Tracer equations, continued from previous page

- (uptake\_nit\_by\_flat)\*(rfr) uptake of nitrate (and phosphate) by flagellates
- (uptake\_phos\_by\_cyano)\*(rfr) uptake of phosphate by cyano bacteria

**Change of: silicate** $\frac{d}{dt} \text{sil} =$ 

- + (respiration\_dia)\*(rfs) respiration of diatoms
- + recycling\_detritus\_to\_sil recycling of detritus
- (uptake\_amm\_by\_dia)\*(rfs) uptake of ammonium (, phosphate and silicate) by diatoms
- (uptake\_nit\_by\_dia)\*(rfs) uptake of nitrate (, phosphate and silicate) by diatoms

**Change of: diatoms** $\frac{d}{dt} \text{dia} =$ 

- + uptake\_amm\_by\_dia uptake of ammonium (, phosphate and silicate) by diatoms
- + uptake\_nit\_by\_dia uptake of nitrate (, phosphate and silicate) by diatoms
- grazing\_miz\_on\_dia Grazing of micro-zooplankton on diatoms
- grazing\_mez\_on\_dia Grazing of meso-zooplankton on diatoms
- respiration\_dia respiration of diatoms
- mortality\_dia mortality of diatoms

**Change of: flagellates** $\frac{d}{dt} \text{flag} =$ 

- + uptake\_amm\_by\_flag uptake of ammonium (and phosphate) by flagellates
- + uptake\_nit\_by\_flat uptake of nitrate (and phosphate) by flagellates

continued on next page...

## Tracer equations, continued from previous page

|                       |                                             |
|-----------------------|---------------------------------------------|
| - grazing_miz_on_flag | Grazing of micro-zooplankton on flagellates |
| - grazing_mez_on_flag | Grazing of meso-zooplankton on flagellates  |
| - respiration_flag    | respiration of flagellates                  |
| - mortality_flag      | mortality of flagellates                    |

## Change of: cyano bacteria

|                        |                                       |
|------------------------|---------------------------------------|
| $\frac{d}{dt}$ cyano = |                                       |
| + uptake_phos_by_cyano | uptake of phosphate by cyano bacteria |
| - grazing_miz_on_cyano | Grazing of micro-zooplankton on cyano |
| - grazing_mez_on_cyano | Grazing of meso-zooplankton on cyano  |
| - respiration_cyano    | respiration of cyano bacteria         |
| - mortality_cyano      | mortality of cyano bacteria           |

## Change of: meso zooplankton

|                        |                                                  |
|------------------------|--------------------------------------------------|
| $\frac{d}{dt}$ mez =   |                                                  |
| + grazing_mez_on_dia   | Grazing of meso-zooplankton on diatoms           |
| + grazing_mez_on_flag  | Grazing of meso-zooplankton on flagellates       |
| + grazing_mez_on_cyano | Grazing of meso-zooplankton on cyano             |
| + grazing_mez_on_miz   | Grazing of meso-zooplankton on micro-zooplankton |
| - respiration_mez      | respiration of meso-zooplankton                  |
| - mortality_mez        | mortality of meso-zooplankton                    |

## Change of: micro zooplakton

|                       |                                             |
|-----------------------|---------------------------------------------|
| $\frac{d}{dt}$ miz =  |                                             |
| + grazing_miz_on_dia  | Grazing of micro-zooplankton on diatoms     |
| + grazing_miz_on_flag | Grazing of micro-zooplankton on flagellates |

continued on next page...

## Tracer equations, continued from previous page

|                        |                                                  |
|------------------------|--------------------------------------------------|
| + grazing_miz_on_cyano | Grazing of micro-zooplankton on cyano            |
| - respiration_miz      | respiration of micro-zooplankton                 |
| - mortality_miz        | mortality of micro-zooplankton                   |
| - grazing_mez_on_miz   | Grazing of meso-zooplankton on micro-zooplankton |

## Change of: Detritus

 $\frac{d}{dt} \text{det} =$ 

|                           |                                |
|---------------------------|--------------------------------|
| + mortality_miz           | mortality of micro-zooplankton |
| + mortality_mez           | mortality of meso-zooplankton  |
| + mortality_dia           | mortality of diatoms           |
| + mortality_flag          | mortality of flagellates       |
| + mortality_cyano         | mortality of cyano bacteria    |
| - recycling_detritus_to_n | recycling of detritus          |

## Change of: S-Detritus

 $\frac{d}{dt} \text{dets} =$ 

|                              |                                         |
|------------------------------|-----------------------------------------|
| + (grazing_miz_on_dia)*(rfs) | Grazing of micro-zooplankton on diatoms |
| + (grazing_mez_on_dia)*(rfs) | Grazing of meso-zooplankton on diatoms  |
| + (mortality_dia)*(rfs)      | mortality of diatoms                    |
| - recycling_detritus_to_sil  | recycling of detritus                   |

## Change of: ldon is the labile DON fraction

 $\frac{d}{dt} \text{ldon} =$ 

|                                 |                                  |
|---------------------------------|----------------------------------|
| + (respiration_miz)*(ldon_frac) | respiration of micro-zooplankton |
| + (respiration_mez)*(ldon_frac) | respiration of meso-zooplankton  |

continued on next page...

## Tracer equations, continued from previous page

|                                       |                               |
|---------------------------------------|-------------------------------|
| + (respiration_dia)*(<br>ldon_frac)   | respiration of diatoms        |
| + (respiration_flag)*(<br>ldon_frac)  | respiration of flagellates    |
| + (respiration_cyano)*(<br>ldon_frac) | respiration of cyano bacteria |
| - degradation_ldon                    | degradation of IDON           |

## Change of: Oxygen

 $\frac{d}{dt}$  oxy =

|                                                                                  |                                                                 |
|----------------------------------------------------------------------------------|-----------------------------------------------------------------|
| + (uptake_amm_by_dia)*(NOR*<br>ONamup)                                           | uptake of ammonium (, phosphate and silicate)<br>by diatoms     |
| + (uptake_nit_by_dia)*(NOR*<br>ONniup)                                           | uptake of nitrate (, phosphate and silicate) by<br>diatoms      |
| + (uptake_amm_by_flag)*(NOR*<br>ONamup)                                          | uptake of ammonium (and phosphate) by<br>flagellates            |
| + (uptake_nit_by_flat)*(NOR*<br>ONniup)                                          | uptake of nitrate (and phosphate) by flagellates                |
| + (uptake_phos_by_cyano)*(<br>NOR*ONamup)                                        | uptake of phosphate by cyano bacteria                           |
| - (nitrification_amm_sed)*(<br>(ONnitr*NOR)/(cgt_cellheight*<br>cgt_density)     | nitrification                                                   |
| - (mineralization_nitr_sed)*(<br>NOR*ldn_0_sed)<br>/(cgt_cellheight*cgt_density) | mineralization of benthic nitrogen, mmol<br>N/m <sup>2</sup> /d |
| - (respiration_miz)*(NOR*<br>ONamup)                                             | respiration of micro-zooplankton                                |
| - (respiration_mez)*(NOR*<br>ONamup)                                             | respiration of meso-zooplankton                                 |
| - (respiration_dia)*(NOR*<br>ONamup)                                             | respiration of diatoms                                          |

continued on next page...

## Tracer equations, continued from previous page

- (respiration\_flag)\*(NOR\*ONamup)      respiration of flagellates
- (respiration\_cyano)\*(NOR\*ONamup)      respiration of cyano bacteria
- (recycling\_detritus\_to\_n)\*(NOR\*ldn\_0)      recycling of detritus
- (nitrification)\*(NOR\*ONnitr)      nitrification

## Change of: nitrogen in the sediment

$$\frac{d}{dt} \text{ nitr} =$$

- mineralization\_nitr\_sed      mineralization of benthic nitrogen, mmol N/m<sup>2</sup>/d

## Change of: silicate in the sediment

$$\frac{d}{dt} \text{ sili} =$$

- mineralization\_sili\_sed      mineralization of benthic silicate, mmol N/m<sup>2</sup>/d

## Change of: reduced nitrogen

$$\frac{d}{dt} \text{ nred} =$$

## Change of: oxidized nitrogen

$$\frac{d}{dt} \text{ nox} =$$

## Change of: oxidized phosphorus (phosphate)

$$\frac{d}{dt} \text{ pox} =$$

## Change of: ammonium; containing

$$\frac{d}{dt} \text{ amm\_with\_totatmos\_N} =$$

- + mineralization of benthic nitrogen, mmol mineralization\_nitr\_sed\_totatmN/m<sup>2</sup>/d; sub-process for totatmos nitrogen cgt\_density)
- + respiration of micro-zooplankton; sub-process (respiration\_miz\_totatmos\_N)\* for totatmos nitrogen ((one-ldon\_frac))

continued on next page...

## Tracer equations, continued from previous page

```

+                                respiration of meso-zooplankton; sub-process
(respiration_mez_totatmos_N)* for totatmos nitrogen
((one-ldon_frac))

+                                respiration of diatoms; sub-process for
(respiration_dia_totatmos_N)* totatmos nitrogen
((one-ldon_frac))

+                                respiration of flagelattes; sub-process for
(respiration_flag_totatmos_N) totatmos nitrogen
*((one-ldon_frac))

+                                respiration of cyano bacteria; sub-process for
(respiration_cyano_totatmos_N)totatmos nitrogen
*((one-ldon_frac))

+                                recycling of detritus; sub-process for totatmos
recycling_detritus_to_n_totatmitrogen

+ degradation_ldon_totatmos_N degradation of lDON; sub-process for totatmos
nitrogen

-                                nitrification
nitrification_amm_sed/(cgt_cel
cgt_density)*
max(0.0,min(1.0,amm_with_totat
))

- uptake_amm_by_dia*            uptake of ammonium (, phosphate and silicate)
max(0.0,min(1.0,amm_with_totatby diatoms
))

- uptake_amm_by_flag*          uptake of ammonium (and phosphate) by
max(0.0,min(1.0,amm_with_totatflagellates
))

- nitrification*               nitrification
max(0.0,min(1.0,amm_with_totat
))

```

## Change of: nitrate; containing

```

 $\frac{d}{dt}$  nit_with_totatmos_N =
+ nitrification_totatmos_N    nitrification; sub-process for totatmos nitrogen

```

continued on next page...



## Tracer equations, continued from previous page

```

- (mineralization_nitr_sed)* mineralization of benthic nitrogen, mmol
(ldn_N_sed)/(cgt_cellheight* N/m2/d
cgt_density)*
max(0.0,min(1.0,nit_with_totat
))

- uptake_nit_by_dia*          uptake of nitrate (, phosphate and silicate) by
max(0.0,min(1.0,nit_with_totatdiatoms
))

- uptake_nit_by_flat*        uptake of nitrate (and phosphate) by flagellates
max(0.0,min(1.0,nit_with_totat
))

- (recycling_detritus_to_n)* recycling of detritus
(ldn_N)*
max(0.0,min(1.0,nit_with_totat
))

```

## Change of: diatoms; containing

```

 $\frac{d}{dt}$  dia_with_totatmos_N =
+          uptake of ammonium (, phosphate and silicate)
uptake_amm_by_dia_totatmos_N by diatoms; sub-process for totatmos nitrogen

+          uptake of nitrate (, phosphate and silicate) by
uptake_nit_by_dia_totatmos_N diatoms; sub-process for totatmos nitrogen

- grazing_miz_on_dia*        Grazing of micro-zooplankton on diatoms
max(0.0,min(1.0,dia_with_totat
))

- grazing_mez_on_dia*        Grazing of meso-zooplankton on diatoms
max(0.0,min(1.0,dia_with_totat
))

- respiration_dia*          respiration of diatoms
max(0.0,min(1.0,dia_with_totat
))

- mortality_dia*            mortality of diatoms
max(0.0,min(1.0,dia_with_totat
))

```

continued on next page...

## Tracer equations, continued from previous page

**Change of: flagellates; containing**

```

 $\frac{d}{dt}$  flag_with_totatmos_N =
    +                               uptake of ammonium (and phosphate) by
    uptake_amm_by_flag_totatmos_N flagellates; sub-process for totatmos nitrogen

    +                               uptake of nitrate (and phosphate) by
    uptake_nit_by_flat_totatmos_N flagellates; sub-process for totatmos nitrogen

    - grazing_miz_on_flag*          Grazing of micro-zooplankton on flagellates
    max(0.0,min(1.0,flag_with_totatmos_N))

    - grazing_mez_on_flag*          Grazing of meso-zooplankton on flagellates
    max(0.0,min(1.0,flag_with_totatmos_N))

    - respiration_flag*             respiration of flagellates
    max(0.0,min(1.0,flag_with_totatmos_N))

    - mortality_flag*               mortality of flagellates
    max(0.0,min(1.0,flag_with_totatmos_N))

```

**Change of: cyano bacteria; containing**

```

 $\frac{d}{dt}$  cyano_with_totatmos_N =
    - grazing_miz_on_cyano*          Grazing of micro-zooplankton on cyano
    max(0.0,min(1.0,cyano_with_totatmos_N))

    - grazing_mez_on_cyano*          Grazing of meso-zooplankton on cyano
    max(0.0,min(1.0,cyano_with_totatmos_N))

    - respiration_cyano*             respiration of cyano bacteria
    max(0.0,min(1.0,cyano_with_totatmos_N))

    - mortality_cyano*               mortality of cyano bacteria
    max(0.0,min(1.0,cyano_with_totatmos_N))

```

continued on next page...

## Tracer equations, continued from previous page

**Change of: meso zooplankton; containing**

$$\begin{aligned}
\frac{d}{dt} \text{mez\_with\_totatmos\_N} = & \\
& + \text{grazing\_mez\_on\_dia\_totatmos\_N} \quad \text{Grazing of meso-zooplankton on diatoms; sub-process for totatmos nitrogen} \\
& + \text{grazing\_mez\_on\_flag\_totatmos\_N} \quad \text{Grazing of meso-zooplankton on flagellates; sub-process for totatmos nitrogen} \\
& + \text{grazing\_mez\_on\_cyano\_totatmos\_process} \quad \text{Grazing of meso-zooplankton on cyano; sub-process for totatmos nitrogen} \\
& + \text{grazing\_mez\_on\_miz\_totatmos\_N} \quad \text{Grazing of meso-zooplankton on micro-zooplankton; sub-process for totatmos nitrogen} \\
& - \text{respiration\_mez*} \quad \text{respiration of meso-zooplankton} \\
& \text{max}(0.0, \text{min}(1.0, \text{mez\_with\_totatmos\_N})) \\
& - \text{mortality\_mez*} \quad \text{mortality of meso-zooplankton} \\
& \text{max}(0.0, \text{min}(1.0, \text{mez\_with\_totatmos\_N}))
\end{aligned}$$

**Change of: micro zooplakton; containing**

$$\begin{aligned}
\frac{d}{dt} \text{miz\_with\_totatmos\_N} = & \\
& + \text{grazing\_miz\_on\_dia\_totatmos\_N} \quad \text{Grazing of micro-zooplankton on diatoms; sub-process for totatmos nitrogen} \\
& + \text{grazing\_miz\_on\_flag\_totatmos\_N} \quad \text{Grazing of micro-zooplankton on flagellates; sub-process for totatmos nitrogen} \\
& + \text{grazing\_miz\_on\_cyano\_totatmos\_process} \quad \text{Grazing of micro-zooplankton on cyano; sub-process for totatmos nitrogen} \\
& - \text{respiration\_miz*} \quad \text{respiration of micro-zooplankton} \\
& \text{max}(0.0, \text{min}(1.0, \text{miz\_with\_totatmos\_N})) \\
& - \text{mortality\_miz*} \quad \text{mortality of micro-zooplankton} \\
& \text{max}(0.0, \text{min}(1.0, \text{miz\_with\_totatmos\_N}))
\end{aligned}$$

continued on next page...

## Tracer equations, continued from previous page

```
- grazing_mez_on_miz*      Grazing of meso-zooplankton on micro-
max(0.0,min(1.0,miz_with_totatzooplankton
))
```

**Change of: Detritus; containing**

```
 $\frac{d}{dt}$  det_with_totatmos_N =
+ mortality_miz_totatmos_N    mortality of micro-zooplankton; sub-process for
                                totatmos nitrogen

+ mortality_mez_totatmos_N    mortality of meso-zooplankton; sub-process for
                                totatmos nitrogen

+ mortality_dia_totatmos_N    mortality of diatoms; sub-process for totatmos
                                nitrogen

+ mortality_flag_totatmos_N   mortality of flagellates; sub-process for
                                totatmos nitrogen

+ mortality_cyano_totatmos_N  mortality of cyano bacteria; sub-process for
                                totatmos nitrogen

- recycling_detritus_to_n*    recycling of detritus
max(0.0,min(1.0,det_with_totat
))
```

**Change of: ldon is the labile DON fraction; containing**

```
 $\frac{d}{dt}$  ldon_with_totatmos_N =
+                                respiration of micro-zooplankton; sub-process
(respiration_miz_totatmos_N)* for totatmos nitrogen
(ldon_frac)

+                                respiration of meso-zooplankton; sub-process
(respiration_mez_totatmos_N)* for totatmos nitrogen
(ldon_frac)

+                                respiration of diatoms; sub-process for
(respiration_dia_totatmos_N)* totatmos nitrogen
(ldon_frac)

+                                respiration of flagelattes; sub-process for
(respiration_flag_totatmos_N) totatmos nitrogen
*(ldon_frac)
```

continued on next page...

## Tracer equations, continued from previous page

```

+                                respiration of cyano bacteria; sub-process for
(respiration_cyano_totatmos_N)totatmos nitrogen
*(ldon_frac)

- degradation_ldon*            degradation of IDON
max(0.0,min(1.0,ldon_with_totatmos_N/m2/d
))

```

**Change of: nitrogen in the sediment; containing**

```

 $\frac{d}{dt}$  nitr_with_totatmos_N =
- mineralization_nitr_sed*      mineralization of bentic nitrogen, mmol
max(0.0,min(1.0,nitr_with_totatmos_N/m2/d
))

```

**Change of: reduced nitrogen; containing**

```

 $\frac{d}{dt}$  nred_with_totatmos_N =

```

**Change of: oxidized nitrogen; containing**

```

 $\frac{d}{dt}$  nox_with_totatmos_N =

```

**Change of: ammonium; containing**

```

 $\frac{d}{dt}$  amm_with_agri_N =
+                                mineralization of bentic nitrogen, mmol
mineralization_nitr_sed_agri_N/m2/d; sub-process for agri nitrogen
cgt_density)

+ (respiration_miz_agri_N)*      respiration of micro-zooplankton; sub-process
((one-ldon_frac))              for agri nitrogen

+ (respiration_mez_agri_N)*      respiration of meso-zooplankton; sub-process
((one-ldon_frac))              for agri nitrogen

+ (respiration_dia_agri_N)*      respiration of diatoms; sub-process for agri
((one-ldon_frac))              nitrogen

+ (respiration_flag_agri_N)*     respiration of flagelattes; sub-process for agri
((one-ldon_frac))              nitrogen

+ (respiration_cyano_agri_N)*    respiration of cyano bacteria; sub-process for
((one-ldon_frac))              agri nitrogen

+                                recycling of detritus; sub-process for agri
recycling_detritus_to_n_agri_N nitrogen

```

continued on next page...

## Tracer equations, continued from previous page

```

+ degradation_ldon_agri_N      degradation of LDON; sub-process for agri
                                nitrogen

-                                nitrification
nitrification_amm_sed/(cgt_cel
cgt_density)*
max(0.0,min(1.0,amm_with_agri_
))

- uptake_amm_by_dia*           uptake of ammonium (, phosphate and silicate)
max(0.0,min(1.0,amm_with_agri_by diatoms
))

- uptake_amm_by_flag*          uptake of ammonium (and phosphate) by
max(0.0,min(1.0,amm_with_agri_flagellates
))

- nitrification*               nitrification
max(0.0,min(1.0,amm_with_agri_
))

```

**Change of: nitrate; containing**

```

 $\frac{d}{dt}$  nit_with_agri_N =
+ nitrification_agri_N          nitrification; sub-process for agri nitrogen

- (mineralization_nitr_sed)*    mineralization of benthic nitrogen, mmol
(ldn_N_sed)/(cgt_cellheight*   N/m2/d
cgt_density)*
max(0.0,min(1.0,nit_with_agri_
))

- uptake_nit_by_dia*            uptake of nitrate (, phosphate and silicate) by
max(0.0,min(1.0,nit_with_agri_diatoms
))

- uptake_nit_by_flat*           uptake of nitrate (and phosphate) by flagellates
max(0.0,min(1.0,nit_with_agri_
))

- (recycling_detritus_to_n)*    recycling of detritus
(ldn_N)*
max(0.0,min(1.0,nit_with_agri_
))

```

continued on next page...

## Tracer equations, continued from previous page

**Change of: diatoms; containing**

$$\begin{aligned} \frac{d}{dt} \text{dia\_with\_agri\_N} = & \\ & + \text{uptake\_amm\_by\_dia\_agri\_N} \quad \text{uptake of ammonium (, phosphate and silicate) by diatoms; sub-process for agri nitrogen} \\ & + \text{uptake\_nit\_by\_dia\_agri\_N} \quad \text{uptake of nitrate (, phosphate and silicate) by diatoms; sub-process for agri nitrogen} \\ & - \text{grazing\_miz\_on\_dia*} \quad \text{Grazing of micro-zooplankton on diatoms} \\ & \quad \text{max(0.0,min(1.0,dia\_with\_agri\_} \\ & \quad \text{))} \\ & - \text{grazing\_mez\_on\_dia*} \quad \text{Grazing of meso-zooplankton on diatoms} \\ & \quad \text{max(0.0,min(1.0,dia\_with\_agri\_} \\ & \quad \text{))} \\ & - \text{respiration\_dia*} \quad \text{respiration of diatoms} \\ & \quad \text{max(0.0,min(1.0,dia\_with\_agri\_} \\ & \quad \text{))} \\ & - \text{mortality\_dia*} \quad \text{mortality of diatoms} \\ & \quad \text{max(0.0,min(1.0,dia\_with\_agri\_} \\ & \quad \text{))} \end{aligned}$$

**Change of: flagellates; containing**

$$\begin{aligned} \frac{d}{dt} \text{flag\_with\_agri\_N} = & \\ & + \text{uptake\_amm\_by\_flag\_agri\_N} \quad \text{uptake of ammonium (and phosphate) by flagellates; sub-process for agri nitrogen} \\ & + \text{uptake\_nit\_by\_flat\_agri\_N} \quad \text{uptake of nitrate (and phosphate) by flagellates; sub-process for agri nitrogen} \\ & - \text{grazing\_miz\_on\_flag*} \quad \text{Grazing of micro-zooplankton on flagellates} \\ & \quad \text{max(0.0,min(1.0,flag\_with\_agri} \\ & \quad \text{))} \\ & - \text{grazing\_mez\_on\_flag*} \quad \text{Grazing of meso-zooplankton on flagellates} \\ & \quad \text{max(0.0,min(1.0,flag\_with\_agri} \\ & \quad \text{))} \\ & - \text{respiration\_flag*} \quad \text{respiration of flagelattes} \\ & \quad \text{max(0.0,min(1.0,flag\_with\_agri} \\ & \quad \text{))} \end{aligned}$$

continued on next page...

## Tracer equations, continued from previous page

```

- mortality_flag*          mortality of flagellates
max(0.0,min(1.0,flag_with_agri
))

```

**Change of: cyano bacteria; containing**

$$\frac{d}{dt} \text{cyano\_with\_agri\_N} =$$

```

- grazing_miz_on_cyano*      Grazing of micro-zooplankton on cyano
max(0.0,min(1.0,cyano_with_agr
))

- grazing_mez_on_cyano*      Grazing of meso-zooplankton on cyano
max(0.0,min(1.0,cyano_with_agr
))

- respiration_cyano*        respiration of cyano bacteria
max(0.0,min(1.0,cyano_with_agr
))

- mortality_cyano*          mortality of cyano bacteria
max(0.0,min(1.0,cyano_with_agr
))

```

**Change of: meso zooplankton; containing**

$$\frac{d}{dt} \text{mez\_with\_agri\_N} =$$

```

+ grazing_mez_on_dia_agri_N  Grazing of meso-zooplankton on diatoms; sub-
                             process for agri nitrogen

+ grazing_mez_on_flag_agri_N Grazing of meso-zooplankton on flaggelates;
                             sub-process for agri nitrogen

+ grazing_mez_on_cyano_agri_N Grazing of meso-zooplankton on cyano; sub-
                             process for agri nitrogen

+ grazing_mez_on_miz_agri_N  Grazing of meso-zooplankton on micro-
                             zooplankton; sub-process for agri nitrogen

- respiration_mez*          respiration of meso-zooplankton
max(0.0,min(1.0,mez_with_agri_
))

- mortality_mez*            mortality of meso-zooplankton
max(0.0,min(1.0,mez_with_agri_
))

```

continued on next page...



## Tracer equations, continued from previous page

**Change of: micro zooplakton; containing**

$$\begin{aligned}
\frac{d}{dt} \text{miz\_with\_agri\_N} = & \\
& + \text{grazing\_miz\_on\_dia\_agri\_N} \quad \text{Grazing of micro-zooplankton on diatoms; sub-} \\
& \quad \text{process for agri nitrogen} \\
& + \text{grazing\_miz\_on\_flag\_agri\_N} \quad \text{Grazing of micro-zooplankton on flagellates; sub-} \\
& \quad \text{process for agri nitrogen} \\
& + \text{grazing\_miz\_on\_cyano\_agri\_N} \quad \text{Grazing of micro-zooplankton on cyano; sub-} \\
& \quad \text{process for agri nitrogen} \\
& - \text{respiration\_miz*} \quad \text{respiration of micro-zooplankton} \\
& \quad \text{max}(0.0, \text{min}(1.0, \text{miz\_with\_agri\_} \\
& \quad \text{))} \\
& - \text{mortality\_miz*} \quad \text{mortality of micro-zooplankton} \\
& \quad \text{max}(0.0, \text{min}(1.0, \text{miz\_with\_agri\_} \\
& \quad \text{))} \\
& - \text{grazing\_mez\_on\_miz*} \quad \text{Grazing of meso-zooplankton on micro-} \\
& \quad \text{max}(0.0, \text{min}(1.0, \text{miz\_with\_agri\_zooplankton} \\
& \quad \text{))}
\end{aligned}$$

**Change of: Detritus; containing**

$$\begin{aligned}
\frac{d}{dt} \text{det\_with\_agri\_N} = & \\
& + \text{mortality\_miz\_agri\_N} \quad \text{mortality of micro-zooplankton; sub-process for} \\
& \quad \text{agri nitrogen} \\
& + \text{mortality\_mez\_agri\_N} \quad \text{mortality of meso-zooplankton; sub-process for} \\
& \quad \text{agri nitrogen} \\
& + \text{mortality\_dia\_agri\_N} \quad \text{mortality of diatoms; sub-process for agri} \\
& \quad \text{nitrogen} \\
& + \text{mortality\_flag\_agri\_N} \quad \text{mortality of flagellates; sub-process for agri} \\
& \quad \text{nitrogen} \\
& + \text{mortality\_cyano\_agri\_N} \quad \text{mortality of cyano bacteria; sub-process for} \\
& \quad \text{agri nitrogen} \\
& - \text{recycling\_detritus\_to\_n*} \quad \text{recycling of detritus} \\
& \quad \text{max}(0.0, \text{min}(1.0, \text{det\_with\_agri\_} \\
& \quad \text{))}
\end{aligned}$$

continued on next page...

## Tracer equations, continued from previous page

**Change of: ldon is the labile DON fraction; containing**

$$\begin{aligned}
\frac{d}{dt} \text{ldon\_with\_agri\_N} = & \\
& + (\text{respiration\_miz\_agri\_N}) * (\text{ldon\_frac}) \quad \text{respiration of micro-zooplankton; sub-process for agri nitrogen} \\
& + (\text{respiration\_mez\_agri\_N}) * (\text{ldon\_frac}) \quad \text{respiration of meso-zooplankton; sub-process for agri nitrogen} \\
& + (\text{respiration\_dia\_agri\_N}) * (\text{ldon\_frac}) \quad \text{respiration of diatoms; sub-process for agri nitrogen} \\
& + (\text{respiration\_flag\_agri\_N}) * (\text{ldon\_frac}) \quad \text{respiration of flagelattes; sub-process for agri nitrogen} \\
& + (\text{respiration\_cyano\_agri\_N}) * (\text{ldon\_frac}) \quad \text{respiration of cyano bacteria; sub-process for agri nitrogen} \\
& - \text{degradation\_ldon} * \text{max}(0.0, \text{min}(1.0, \text{ldon\_with\_agri\_N})) \quad \text{degradation of lDON}
\end{aligned}$$

**Change of: nitr in the sediment; containing**

$$\begin{aligned}
\frac{d}{dt} \text{nitr\_with\_agri\_N} = & \\
& - \text{mineralization\_nitr\_sed} * \text{max}(0.0, \text{min}(1.0, \text{nitr\_with\_agri\_N}/\text{m2}/\text{d})) \quad \text{mineralization of bentic nitrogen, mmol}
\end{aligned}$$

**Change of: nred reduced nitrogen; containing**

$$\frac{d}{dt} \text{nred\_with\_agri\_N} =$$

**Change of: nox oxidized nitrogen; containing**

$$\frac{d}{dt} \text{nox\_with\_agri\_N} =$$
